# Supplementary material
Source: ML conference proceedings conference paper supplement (https://openaccess.thecvf.com/content/CVPR2021/html/Ding_Deeply_Shape-Guided_Cascade_CVPR_2021_paper.html)
Supplement: Supplementary file 1 [file Ding_Deeply_Shape-Guided_Cascade_CVPR_2021_supplemental.pdf]

## Supplementary Material

Hao Ding<sup>1</sup>, Siyuan Qiao<sup>1</sup>, Alan Yuille<sup>1</sup>, Wei Shen<sup>2</sup>(✉)

<sup>1</sup>Department of Computer Science, Johns Hopkins University

<sup>2</sup>MoE Key Lab of Artificial Intelligence, AI Institute, Shanghai Jiao Tong University

{hding15, siyuan.qiao, ayuille1}@jhu.edu, wei.shen@sjtu.edu.cn

### 1. Illustration of shape-guided RoIAlign

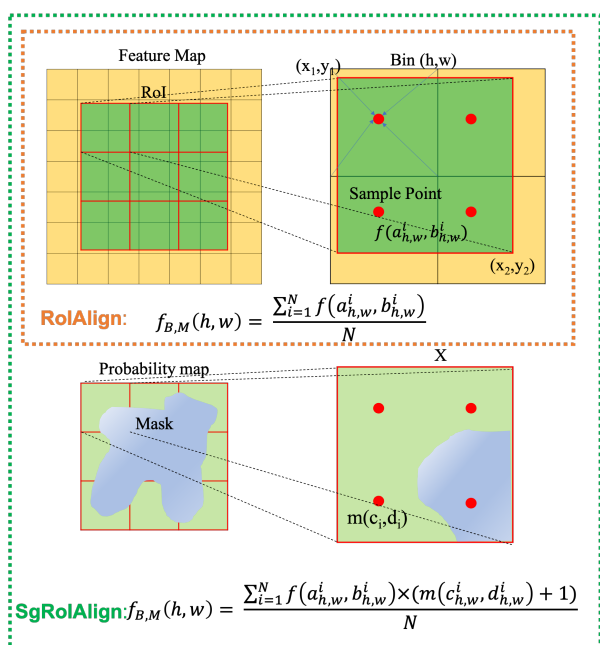

Figure 1: A diagram of shape-guided RoIAlign.

We provide a diagram of shape-guided RoIAlign in Fig .1. The upper part is the same as RoIAlign. We can observe that the difference between them is we impose the explicit shape-guidance according to a probability map.
